# Supplementary material
Source: PubMed Central journal article supplement (PMC10300699)
Supplement: jama-e237693-s001.pdf [file jama-e237693-s001.pdf]

## Supplementary Online Content

Nguyen M, Panyadahundi A, Olagun-Samuel C, et al. Transition from mentored to independent National Institutes of Health funding by gender and department. *JAMA*.  
doi:10.1001/jama.2023.7693

### **eMethods**

### **eReferences**

This supplementary material has been provided by the authors to give readers additional information about their work.

## **eMethods**

We retrieved publicly available data from National Institutes of Health (NIH) RePORTER database ([reporter.nih.gov](https://reporter.nih.gov)) for mentored K-awards and R01-equivalent grants from 1997 to 2021 to all departments in schools of medicine (including MDs, MD-PhDs, and PhDs). Mentored K-awards included K01, K07, K08, K18, K22, K23, K25, and K99. R01-equivalent grants are defined by the NIH to include DP1, DP2, DP5, R01, R29, R35, R37, RF1, RL1, and U01.<sup>1</sup>

## **eReferences**

1. National Institutes of Health. RePORTER Data Book. Accessed December 4, 2022.  
<https://report.nih.gov/nihdatabook/report/29>
