# Supplementary material
Source: PubMed Central journal article supplement (PMC10300699)
Supplement: jama-e237693-s002.pdf [file jama-e237693-s002.pdf]

## Supplementary Online Content

Nguyen M, Panyadahundi A, Olagun-Samuel C, et al. Transition from mentored to independent National Institutes of Health funding by gender and department. *JAMA*. doi:10.1001/jama.2023.7693

### Data Sharing Statement

#### Data

**Data available:** No
